# Supplementary material for: Prevalence of monogenic diabetes amongst Polish children after a nationwide genetic screening campaign
Source: PubMed Central journal article supplement — Diabetologia. 2012 Jul 11;55(10):2631–5. doi: 10.1007/s00125-012-2621-2 (PMC3433657; doi:10.1007/s00125-012-2621-2), 2012-07-11
Supplement: 125_2012_2621_MOESM4_ESM.pdf [file 125_2012_2621_MOESM4_ESM.pdf]

**ESM Table 1** - Epidemiologic characteristics of the studied regions and centres.

|                                                          | <b>Lodz (Lodzkie voivodeship)</b>            | <b>Katowice (Slaskie voivodeship)</b>        | <b>Gdansk (Pomorskie voivodeship)</b>        | <b>Overall</b>                                     |
|----------------------------------------------------------|----------------------------------------------|----------------------------------------------|----------------------------------------------|----------------------------------------------------|
| Mean number of children ( $\pm$ SD; range)               | 409,413 $\pm$ 20,667<br>(522,284 to 464,204) | 888,980 $\pm$ 40,701<br>(954,522 to 840,847) | 491,564 $\pm$ 13,197<br>(513,182 to 475,439) | 1,870,957 $\pm$ 74,529<br>(1,989,988 to 1,780,490) |
| Mean number of children with diabetes ( $\pm$ SD; range) | 706 $\pm$ 71<br>(601 to 797)                 | 937 $\pm$ 68<br>(850 to 1,035)               | 654 $\pm$ 71<br>(557 to 736)                 | 2297 $\pm$ 208<br>(2,008 to 2,568)                 |
| Mean number of children with T1DM ( $\pm$ SD; range)     | 680 $\pm$ 69<br>(576 to 769)                 | 900 $\pm$ 64<br>(819 to 995)                 | 620 $\pm$ 67<br>(531 to 698)                 | 2200 $\pm$ 199<br>(1,926 to 2,462)                 |
